# Supplementary material for: Imaging groundwater infiltration dynamics in the karst vadose zone with long-term ERT monitoring
Source: Copernicus journal article supplement (doi:10.5194/hess-22-1563-2018), 2018-03-01
Supplement: Supplementary file [file hess-22-1563-2018-supplement-title-page.pdf › hess-22-1563-2018-supplement-title-page.pdf]

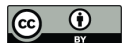

## *Supplement of*

# **Imaging groundwater infiltration dynamics in the karst vadose zone with long-term ERT monitoring**

**Arnaud Watlet et al.**

*Correspondence to:* Arnaud Watlet ([arnaud.watlet@umons.ac.be](mailto:arnaud.watlet@umons.ac.be))

- [hess-22-1563-2018-supplement-title-page.pdf](#)
- Supplements
  - [Animation\\_DipoleDipole\\_Results.mp4](#)
  - [Animation\\_Gradient\\_Results.mp4](#)
  - [Supplement1\\_temperature\\_correction.pdf](#)

The copyright of individual parts of the supplement might differ from the CC BY 4.0 License.
